# Supplementary material for: aCGH Analysis to Estimate Genetic Variations among Domesticated Chickens
Source: Biomed Res Int. 2016 Jul 21;2016:1794329. doi: 10.1155/2016/1794329 (PMC4972930; doi:10.1155/2016/1794329)
Supplement: Supplementary file 1 — CR validation of Duplicated or lost genes found with aCGH analysis. We have selected four or five genes from the Koeyoshi genes (lost or highly mutated), Shamo genes (duplicated/lost or highly mutated) and Katsura-chabo (lost or highly mutated). Probe names, corresponding Ensembl gene names and annotations, and primers as shown in the table. [file 1794329.f1.xlsx]

## Sheet: PCR
Supplementary data 1
probe_name	ref_description	ENS_ID	probe_location	description	probe	gene_location	expected size	strand	Forward		Reverse
Koeyoshi_lost or highly mutaed
A_94_P12586454		ENSGALG00000008293	gga|chr6:25273256-25273316	SH3 and PX domains 2A [Source:HGNC Symbol;Acc:23664]	AATTTAAAAAGTGTAATGAGAAGCCACCATTGAAGTTGAACCTCTTTTTAATCGCCTGTG	25248120:25308153	998	R	TCTTTTTGCAGGATGGTGGT	Start: 34295 Length: 20 bp Tm: 60.5 °C GC: 45.0 % ANY: 4.0 SELF: 0.0	TAAGGGGCAGAGTCATCCAA	Start: 35292 Length: 20 bp Tm: 60.6 °C GC: 50.0 % ANY: 3.0 SELF: 0.0	Product Size: 998 bp Pair Any: 5.0 Pair End: 1.0
A_94_P13409774		ENSGALG00000007149	gga|chr14:9113212-9113272	cytohesin 3 [Source:HGNC Symbol;Acc:9504]	GACCACACCTGTCAATAGATAAATAGAAATGTTCATGTGATATTTGTTTCTGGTGCAGCA	9076449:9125177	746	F	TTGTACAGGCCTTACGGTGA	Start: 36151 Length: 20 bp Tm: 59.2 °C GC: 50.0 % ANY: 8.0 SELF: 3.0	CTCAGGCAGCTCAGGCTAAC	Start: 36896 Length: 20 bp Tm: 60.3 °C GC: 60.0 % ANY: 4.0 SELF: 2.0	Product Size: 746 bp Pair Any: 4.0 Pair End: 2.0
A_94_P13240745		ENSGALG00000005499	gga|chr12:8814237-8814297	interleukin 17 receptor D [Source:HGNC Symbol;Acc:17616]	AACAATCTTTTCTAACGATAAGAAGTGTCCATTTCAGAAGTTAATGCCACAGACAAGTCC	8785554:8832239	935	R	ATGCAGAGGTTTGGAAATGG	Start: 17230 Length: 20 bp Tm: 59.9 °C GC: 45.0 % ANY: 4.0 SELF: 0.0	AGCGTGTGCAACAAAAACAG	Start: 18164 Length: 20 bp Tm: 60.0 °C GC: 45.0 % ANY: 4.0 SELF: 1.0	Product Size: 935 bp Pair Any: 4.0 Pair End: 0.0
A_94_P12300750		ENSGALG00000023449	gga|chr5:18139048-18139107	catenin (cadherin-associated protein), delta 1 [Source:HGNC Symbol;Acc:2515]	GAGTGTTAACCACCAATTAAGCACACAATTAATTTGAAGCAGATACAAGATCCCTCCTG	18128284:18147813	981	F	GGGCAGTTAAGGACCATCAA	Start: 10284 Length: 20 bp Tm: 59.9 °C GC: 50.0 % ANY: 4.0 SELF: 3.0	CAACCACTTCCACCCTGAGT	Start: 11264 Length: 20 bp Tm: 60.0 °C GC: 55.0 % ANY: 3.0 SELF: 3.0	Product Size: 981 bp Pair Any: 4.0 Pair End: 1.0
			1：A_94_P12586454			1：A_94_P13240745
			2：A_94_P13409774			2：A_94_P12300750
			M：Marker			M：Marker
Shamo_diplicated
A_94_P11517070	gb|Gallus gallus finished cDNA, clone ChEST372a18.	ENSGALG00000010385	gga|chr3:32192184-32192244	tight junction associated protein 1 (peripheral) [Source:HGNC Symbol;Acc:17949]	AATTTTCACTCAGTTTAACCAGCCTACATCTTAAATACCACATTCAACACTGGAGATTGG	32175697:32211791	887	R	TAATCTGGCTTGAGGCTCGT	Start: 19428 Length: 20 bp Tm: 60.0 °C GC: 50.0 % ANY: 5.0 SELF: 1.0	TTCACTGAGACAGGGTGCAG	Start: 20314 Length: 20 bp Tm: 60.0 °C GC: 55.0 % ANY: 5.0 SELF: 2.0	Product Size: 887 bp Pair Any: 4.0 Pair End: 1.0
A_94_P13637776	ref|Gallus gallus myosin, heavy chain 7B, cardiac muscle, beta (MYH7B), mRNA.	ENSGALG00000003157	gga|chr20:2594973-2595028	myosin, heavy chain 7B, cardiac muscle, beta [Source:HGNC Symbol;Acc:15906]	AGCAAACATTCCCATTACTTCCACCTTTATGTGAGATCACCTTTTTCAGAGCAAG	2584188:2613711	733	R	TCTGGAGAAGTCGGAGGCTA	Start: 18373 Length: 20 bp Tm: 60.1 °C GC: 55.0 % ANY: 4.0 SELF: 2.0	ACACGCTCTGTCAGCTCCTT	Start: 19105 Length: 20 bp Tm: 60.2 °C GC: 55.0 % ANY: 5.0 SELF: 1.0	Product Size: 733 bp Pair Any: 5.0 Pair End: 1.0
A_94_P11904036	ref|Gallus gallus doublecortex (DCX), mRNA.	ENSGALG00000007993	gga|chr4:13344862-13344922	doublecortin [Source:HGNC Symbol;Acc:2714]	AACTGCTGACCAAAGAAGAGTTATGACAGAATCACAATACAGATTTACCTTTTCAACTGT	13329098:13403836	834	F	TCTTTCCCCACTCCATGAAC	Start: 15280 Length: 20 bp Tm: 59.9 °C GC: 50.0 % ANY: 4.0	CGTACTCCCAGGAATCCAGA	Start: 16113 Length: 20 bp Tm: 60.1 °C GC: 55.0 % ANY: 5.0	Product Size: 834 bp Pair Any: 4.0 Pair End: 0.0
A_94_P12939577	ref|Gallus gallus serine/threonine kinase 25 (STE20 homolog, yeast) (STK25), mRNA.	ENSGALG00000005777	gga|chr9:6126799-6126859	serine/threonine kinase 25 [Source:HGNC Symbol;Acc:11404]	GGCTCATCACATAAGATCACATAGGATGCTTCACAACTAATAGACAAACTTCTACAGACT	6120172:6138129	749	R	GAGTGGCTGGACAACTGACA	Start: 11063 Length: 20 bp Tm: 59.9 °C GC: 55.0 % ANY: 3.0	CTTTAGCTGTTGGCCTCTGG	Start: 11811 Length: 20 bp Tm: 60.0 °C GC: 55.0 % ANY: 4.0	Product Size: 749 bp Pair Any: 5.0 Pair End: 2.0
			M：Marker			1：A_94_P11904036			1：A_94_P12939577
			1：A_94_P11517070			M：Marker			M：Marker
			2：A_94_P13637776
Shamo_lost or highly mutaed
A_94_P13999312	gb|Gallus gallus finished cDNA, clone ChEST447e23.	ENSGALG00000000220	gga|chrZ:45217432-45217492	adenomatous polyposis coli [Source:HGNC Symbol;Acc:583]	AGTCACATGCTAACTCAAATCCTGCTTCTTTTAGACAATAGGCTTTTGTATGATGCACTA	45185590:45242428	890	R	TAGGGGAGGGGAAGTAATGC	Start: 24429 Length: 20 bp Tm: 60.3 °C GC: 55.0 % ANY: 2.0	AGTTCCGCAAGCAAAAGAGA	Start: 25318 Length: 20 bp Tm: 60.1 °C GC: 45.0 % ANY: 4.0	Product Size: 890 bp Pair Any: 4.0 Pair End: 0.0
A_94_P13662532	ref|Gallus gallus collagen, type IX, alpha 3 (COL9A3), mRNA.	ENSGALG00000005628	gga|chr20:8342333-8342393	collagen, type IX, alpha 3 [Source:HGNC Symbol;Acc:2219]	ATTTCAGTTACACCGTGGAATATACCAGAAAACTAAATTCTTGTCACGTAGATGTAGCCT	8327116:8360107	889	F	GGTGCGTTTTCTGGAGGTAA	Start: 14482 Length: 20 bp Tm: 60.1 °C GC: 50.0 % ANY: 2.0	GGGTTCCAAAAGCCTTTCTC	Start: 15370 Length: 20 bp Tm: 60.1 °C GC: 50.0 % ANY: 7.0	Product Size: 889 bp Pair Any: 5.0 Pair End: 2.0
A_94_P10860763	ref|Gallus gallus ATP-binding cassette, sub-family B (MDR/TAP), member 1 (ABCB1), mRNA.	ENSGALG00000008912	gga|chr2:20665623-20665683	ATP-binding cassette, sub-family B (MDR/TAP), member 1 [Source:HGNC Symbol;Acc:40]	GGGCCAAAAGTATTGATTCTAACCCAAAAATGATTTTTTAACTCATACCGACAAAGTCTG	20652186:20686687	853	R	AGCATGAAAAAGCCAGGAGA	Start: 20697 Length: 20 bp Tm: 60.0 °C GC: 45.0 % ANY: 4.0 SELF: 0.0	ATGGCCATTCGTTTTTGTTC	Start: 21549 Length: 20 bp Tm: 59.8 °C GC: 40.0 % ANY: 8.0 SELF: 0.0	Product Size: 853 bp Pair Any: 5.0 Pair End: 2.0
A_94_P10932970	ref|Gallus gallus topoisomerase (DNA) II beta 180kDa (TOP2B), mRNA.	ENSGALG00000011300	gga|chr2:37845154-37845214	topoisomerase (DNA) II beta 180kDa [Source:HGNC Symbol;Acc:11990]	AAAACTCAAGTAGCCCAACATTGTCAAAAAAGCAAGACTTGCATTATCTCCAAGATGAAT	37831896:37894640	924	R	CTGCTGGACTGCACAAAGTC	Start: 49228 Length: 20 bp Tm: 59.6 °C GC: 55.0 % ANY: 4.0 SELF: 2.0	GGAGAGGATGCCAAAATTCA	Start: 50151 Length: 20 bp Tm: 60.0 °C GC: 45.0 % ANY: 4.0 SELF: 1.0	Product Size: 924 bp Pair Any: 3.0 Pair End: 0.0
A_94_P12708230	ref|Gallus gallus chimerin (chimaerin) 1 (CHN1), mRNA.	ENSGALG00000009293	gga|chr7:17899828-17899888	chimerin (chimaerin) 1 [Source:HGNC Symbol;Acc:1943]	ACTGAGATACTTGCTTGTGTAATACGATTCCAGATAGACCATCATTTGTGTATGTGTCAC	17889151:17967147	999	F	GCCTGGAACCTACACTTTGG	Start: 9815 Length: 20 bp Tm: 59.6 °C GC: 55.0 % ANY: 3.0 SELF: 1.0	GGCCATGAAAATCACATTCC	Start: 10813 Length: 20 bp Tm: 60.1 °C GC: 45.0 % ANY: 4.0 SELF: 1.0	Product Size: 999 bp Pair Any: 4.0 Pair End: 2.0
			M：Marker			1：A_94_P10932970
			1：A_94_P13999312			2：A_94_P12708230
			2：A_94_P13662532			M：Marker
			3：A_94_P10860763
Katsura_lost or highly mutaed
A_94_P11867720	ref|Gallus gallus fibroblast growth factor 13 (FGF13), mRNA.	ENSGALG00000006508	gga|chr4:4904270-4904330	fibroblast growth factor 13 [Source:HGNC Symbol;Acc:3670]	AAATTCCCACACCAACTTAACAATAAATTGGGTCCTTTGTTACGCTTAACGAAAGAACAG	4764822:4978569	945	R	CATTGCAGCTCCTTCATTCA	Start: 73531 Length: 20 bp Tm: 59.9 °C GC: 45.0 % ANY: 4.0 SELF: 1.0	TCCACTGTGCATTCCACTTC	Start: 74475 Length: 20 bp Tm: 59.7 °C GC: 50.0 % ANY: 5.0 SELF: 0.0	Product Size: 945 bp Pair Any: 4.0 Pair End: 0.0
A_94_P11203540	ref|Gallus gallus cadherin 2, type 1, N-cadherin (neuronal) (CDH2), mRNA.	ENSGALG00000015132	gga|chr2:107968915-107968975	cadherin 2, type 1, N-cadherin (neuronal) [Source:HGNC Symbol;Acc:1759]	CTGGACTAGTGCACTGTATACTCTGAACAGGTTAATCTTTTTCTCGTGTTCTACCACAAT	107949116:108063955	925	R	AGGTTCCTGGAGGCTGGTAT	Start: 94091 Length: 20 bp Tm: 60.0 °C GC: 55.0 % ANY: 5.0 SELF: 2.0	CCCACATGACTCCTTTCCAT	Start: 95073 Length: 20 bp Tm: 59.8 °C GC: 50.0 % ANY: 4.0 SELF: 2.0	Product Size: 983 bp Pair Any: 4.0 Pair End: 2.0
A_94_P13224648	ref|Gallus gallus makorin, ring finger protein, 2 (MKRN2), mRNA.	ENSGALG00000004991	gga|chr12:5149124-5149184	makorin ring finger protein 2 [Source:HGNC Symbol;Acc:7113]	AGGGTAGTAAGTTGTGCTAAAAATCTCGGCTTAGTAGTTTGTAAATGACCACATTCTACG	5141151:5152052	772	F	GAGACTCCGCAACCTCTTTG	Start: 7868 Length: 20 bp Tm: 60.0 °C GC: 55.0 % ANY: 5.0 SELF: 1.0	CCATCAGCTTTGCTGTTCAA	Start: 8639 Length: 20 bp Tm: 60.0 °C GC: 45.0 % ANY: 5.0 SELF: 3.0	Product Size: 772 bp Pair Any: 4.0 Pair End: 3.0
A_94_P13164248	ref|Gallus gallus amyloid beta precursor protein binding protein 1 (APPBP1), mRNA.	ENSGALG00000005211	gga|chr11:12196312-12196372	NEDD8 activating enzyme E1 subunit 1 [Source:HGNC Symbol;Acc:621]	TTGAATATGCATATGTGTGACTACACAGCAGCCTGAATTGTCTTGCAACTGGAAAATTAT	12186822:12200565	997	F	TTGCTTTGTGAGTATCCTTGG	Start: 9072 Length: 21 bp Tm: 57.9 °C GC: 42.9 % ANY: 4.0 SELF: 2.0	GCCTAAGCAGAAGGAGCAGA	Start: 10068 Length: 20 bp Tm: 59.9 °C GC: 55.0 % ANY: 4.0 SELF: 0.0	Product Size: 997 bp Pair Any: 5.0 Pair End: 1.0
A_94_P13164810	ref|Gallus gallus thymidine kinase 2, mitochondrial (TK2), nuclear gene encoding mitochondrial protein, mRNA.	ENSGALG00000005261	gga|chr11:12329169-12329229	thymidine kinase 2, mitochondrial [Source:HGNC Symbol;Acc:11831]	GTAGGAGAGAGAGAACTAGATGGTATTACCAAACCTAACATCCAGGATTATTGTGCTTTG	12312077:12343268	708	F	TTGCAGATTTCCCCAGTAAGA	Start: 16679 Length: 21 bp Tm: 59.7 °C GC: 42.9 % ANY: 4.0 SELF: 0.0	CAGAATTACTCCCCGGAACA	Start: 17386 Length: 20 bp Tm: 59.9 °C GC: 50.0 % ANY: 4.0 SELF: 2.0	Product Size: 708 bp Pair Any: 5.0 Pair End: 0.0
			M：Marker				M：Marker
			1：A_94_P11867720				1：A_94_P13164810
			2：A_94_P11203540
			3：A_94_P13224648
			4：A_94_P13164248
